# Supplementary material for: Disruptions in cortico-subcortical covariance networks associated with anxiety in new-onset childhood epilepsy
Source: PubMed Central journal article supplement — Neuroimage Clin. 2016 Oct 23;12:815–24. doi: 10.1016/j.nicl.2016.10.017 (PMC5094270; doi:10.1016/j.nicl.2016.10.017), 2016-10-23
Supplement: mmc3.pdf [file mmc3.pdf]

I. Sub-analysis: controlling for Epilepsy syndrome (ILRE/IGE)

1. Adjacency matrices

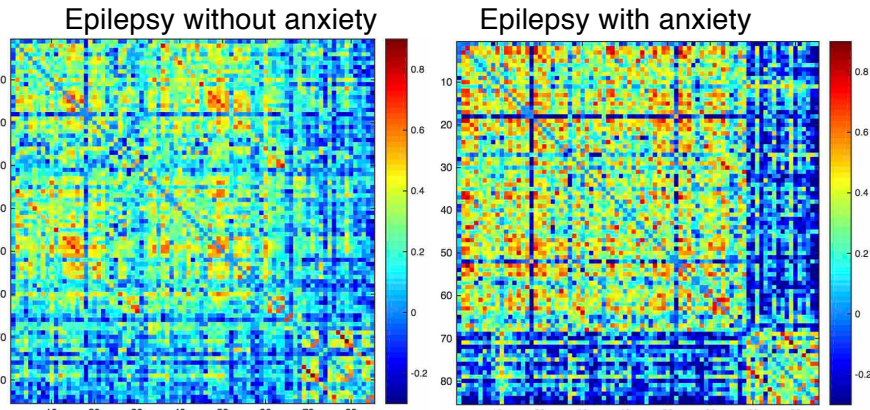

Figure 1a: Unthresholded matrices for epilepsy without anxiety (left), and epilepsy with anxiety (right) after controlling for epilepsy syndrome.

2. Global measures

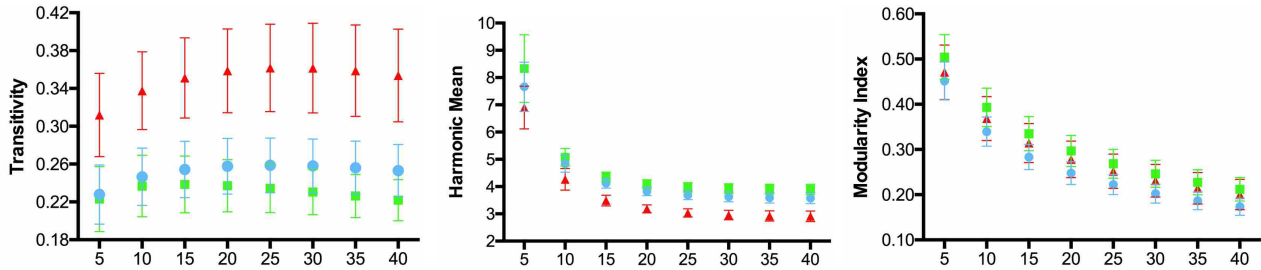

Figure 1b: Transitivity (left), harmonic mean (middle), and modularity index (right) in controls (blue), children with epilepsy without anxiety (green), and children with epilepsy and anxiety (red), while controlling for epilepsy syndrome.

3. Local measures

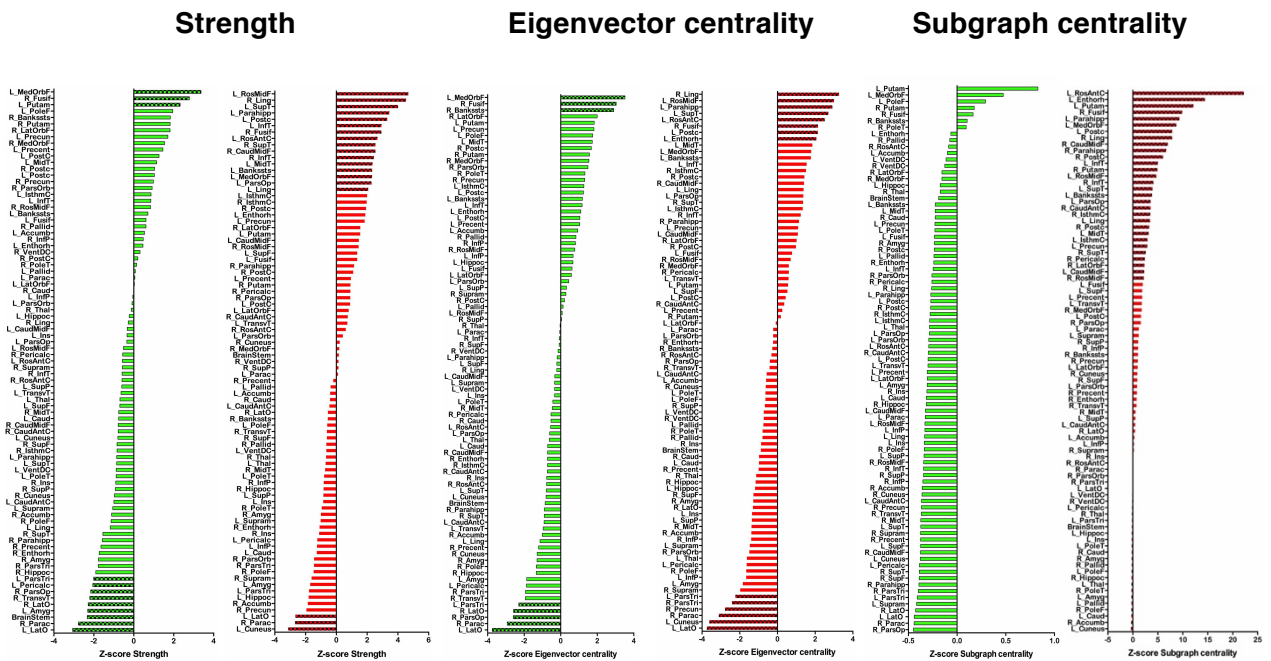

Figure 1c: Ranked Z-score distribution for the strength (left), eigenvector centrality (middle), and subgraph centrality (right) on children with epilepsy without anxiety (green), and children with epilepsy and anxiety disorder (red).

II. Sub-analysis: controlling for AED

1. Adjacency matrices

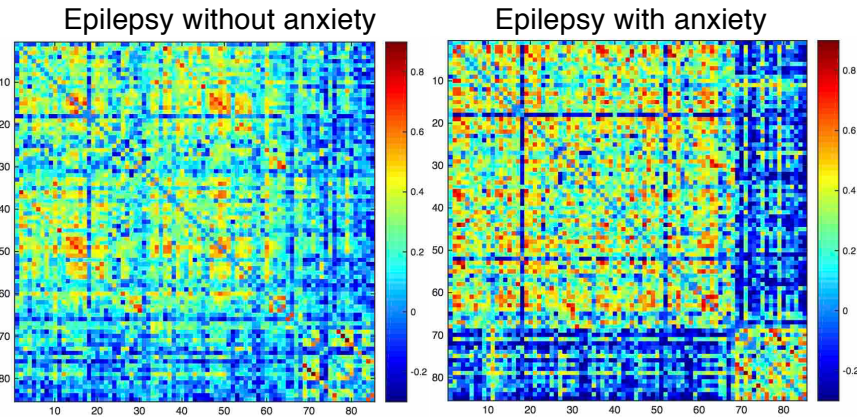

Figure 2a: Unthresholded matrices for epilepsy without anxiety (left), and epilepsy with anxiety (right) after controlling for AED.

2. Global Measures

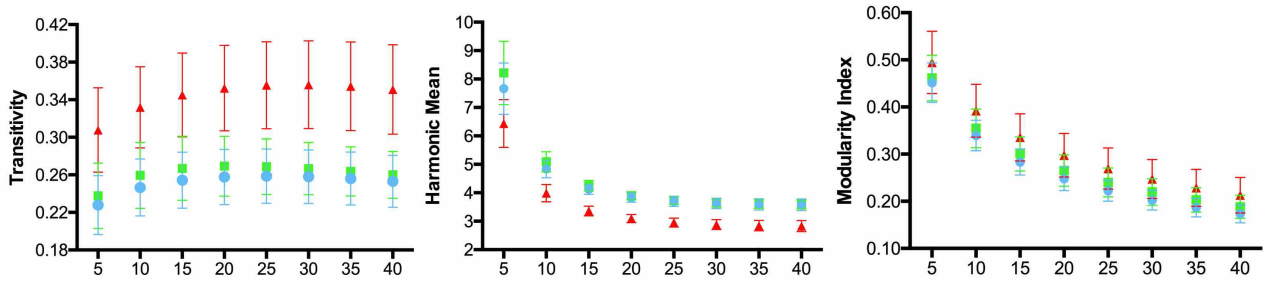

Figure 2b: Transitivity (left), harmonic mean (middle), and modularity index (right) in controls (blue), children with epilepsy without anxiety (green), and children with epilepsy and anxiety (red), while controlling for AED.

3. Local measures

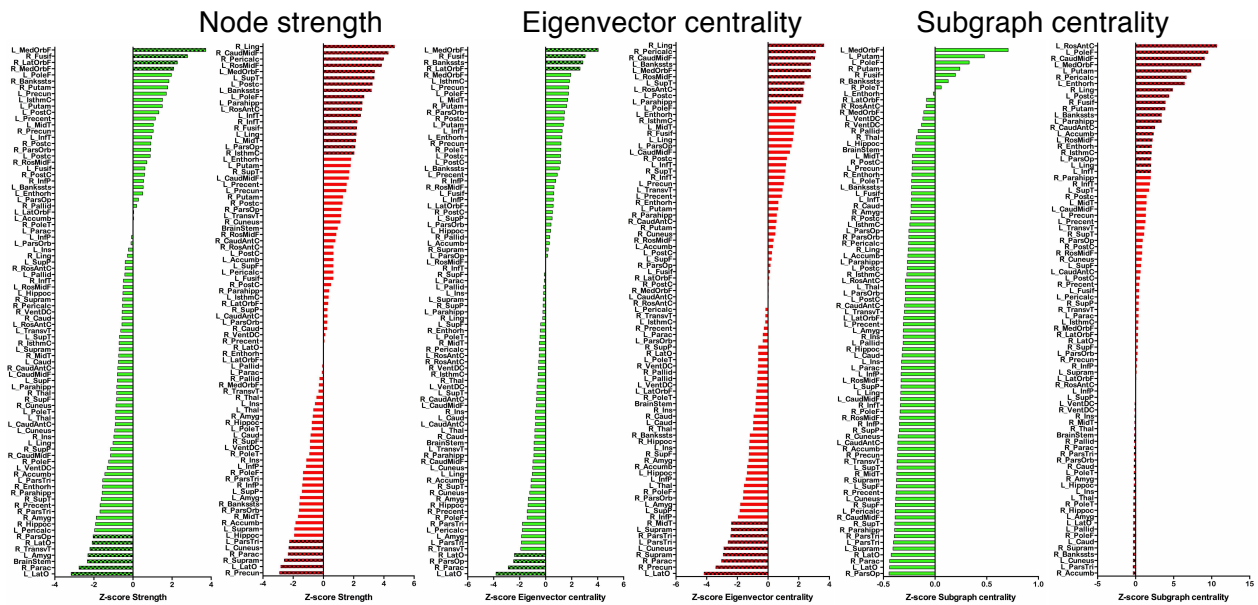

Figure 2c: Ranked Z-score distribution for the strength (left), eigenvector centrality (middle), and subgraph centrality (right) on children with epilepsy without anxiety (green), and children with epilepsy and anxiety disorder (red).



### III. Sub-analysis: controlling for gender

#### 1. Adjacency matrices

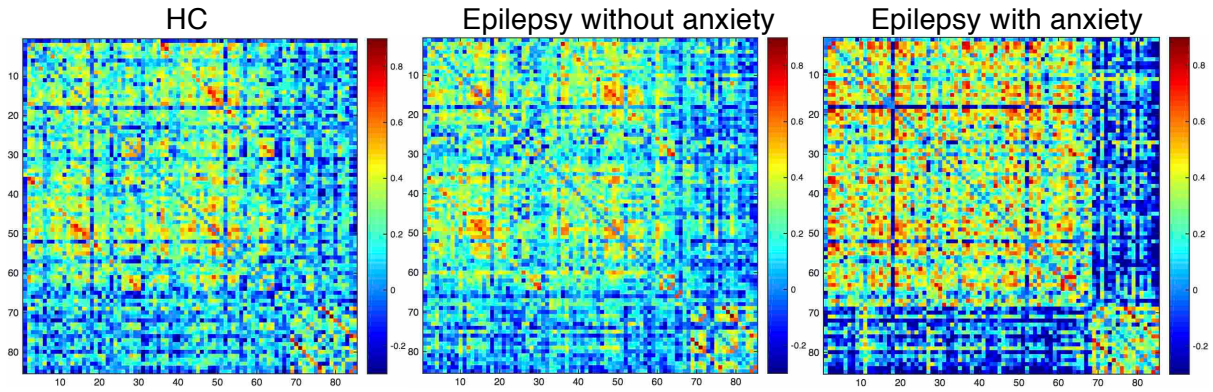

**Figure 3a:** Unthresholded matrices for controls (left), epilepsy without anxiety (middle), and epilepsy with anxiety (right) after controlling for gender.

#### 2. Global measures

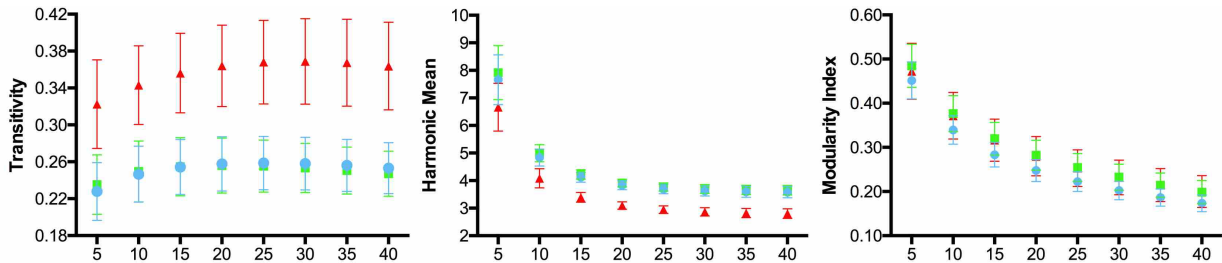

**Figure 3b:** Transitivity (left), harmonic mean (middle), and modularity index (right) in controls (blue), children with epilepsy without anxiety (green), and children with epilepsy and anxiety (red), while controlling for gender.

#### 3. Local Measures

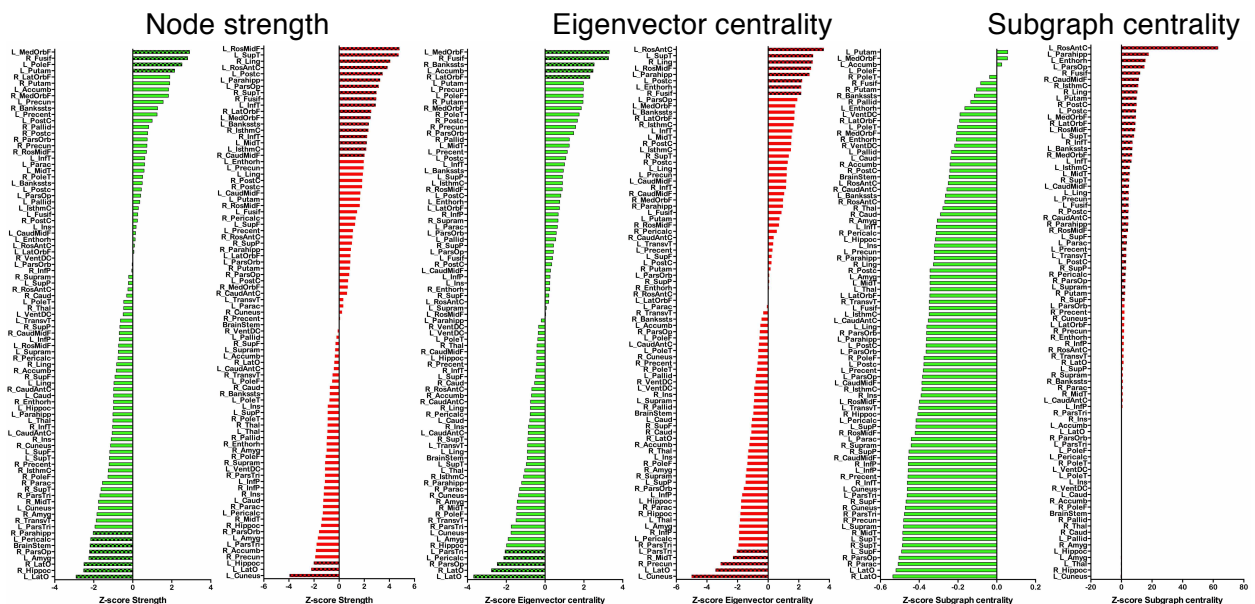

**Figure 3c:** Ranked Z-score Strength distribution for the strength (left), eigenvector centrality (middle), and subgraph centrality (right) on children with epilepsy without anxiety (green), and children with epilepsy and anxiety disorder (red).

#### IV. Sub-analysis: each group with 24 individuals

##### 1. Adjacency matrices

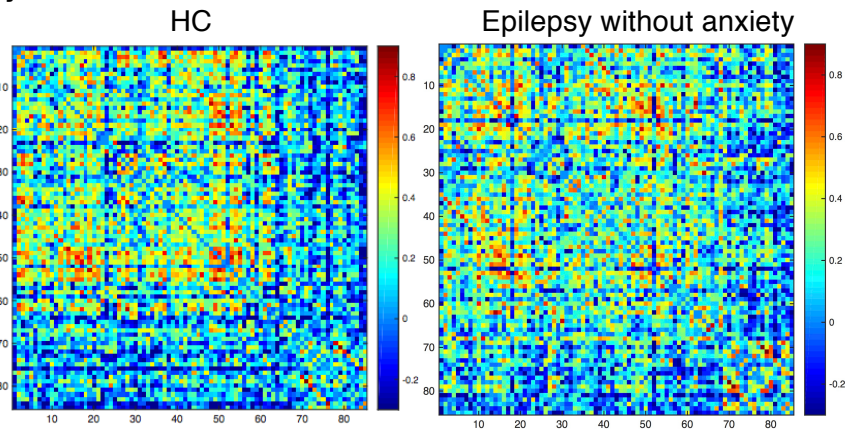

**Figure 4a:** Unthresholded matrices for HC (left), and epilepsy without anxiety (right) after reducing the number of individuals to 24 per group.

##### 2. Global measures

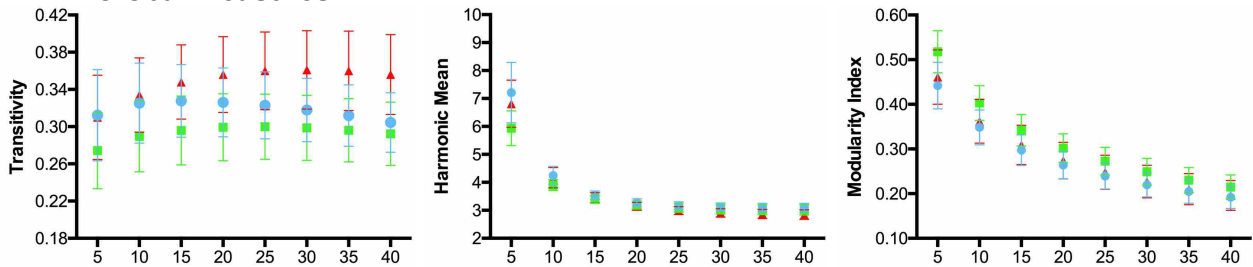

**Figure 4b:** Transitivity (left), harmonic mean (middle), and modularity index (right) in controls (blue), children with epilepsy without anxiety (green), and children with epilepsy and anxiety (red), after reducing the number of individuals to 24 per group.

##### 3. Local measures

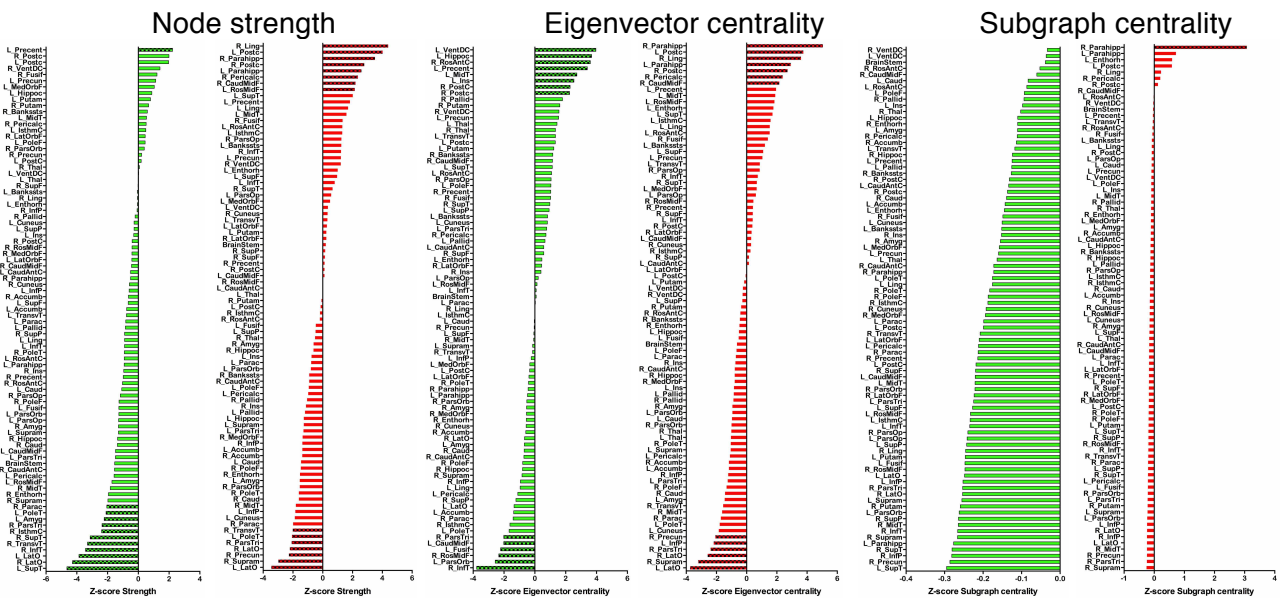

**Figure 4c:** Ranked Z-score distribution for the strength (left), eigenvector centrality (middle), and subgraph centrality (right) on children with epilepsy without anxiety (green), and children with epilepsy and anxiety disorder (red).
